# Supplementary material for: Fabrication of doubly responsive polymer functionalized silica nanoparticles via a simple thiol–ene click chemistry
Source: Royal Society of Chemistry journal article supplement (doi:10.1039/c2py20333b), 2012-01-01
Supplement: c2py20333b.pdf [file c2py20333b.pdf]

## SUPPORTING INFORMATION

### **Fabrication of Doubly-Responsive Polymer Functionalized Silica Nanoparticles via a Simple Thiol-Ene Click Chemistry**

Yohei Kotsuchibashi<sup>a,b,c</sup>, Mitsuhiro Ebara<sup>a</sup>, Takao Aoyagi<sup>a,d</sup>, Ravin Narain<sup>\*.b</sup>

<sup>a</sup>*Biomaterials Unit, National Institute for Materials Science (NIMS), 1-1 Namiki, Tsukuba, Ibaraki, 305-0044, Japan*

<sup>b</sup>*Department of Chemical and Materials Engineering and Alberta Ingenuity Center for Carbohydrate Science, University of Alberta, Edmonton, AB, T6G2G6, Canada*

<sup>c</sup>*Japan Society for the Promotion of Science (JSPS), 8 Ichibancho, Chiyoda-ku, Tokyo, 102-8472, Japan*

<sup>d</sup>*Graduate School of Pure and Applied Sciences, University of Tsukuba, 1-1-1 Tenodai, Tsukuba, Ibaraki, 305-8571, Japan*

## FIGURE LEGENDS (SUPPORTING INFORMATION)

**Figure S1.** UV spectra of aqueous solution of (A) PDEAEMA-SH and (B) PNIPAAm-SH.

**Figure S2.** TEM image of (A) Silica-C=C, (B) Silica-D100, (C) Silica-D75N25, (D) Silica-D50N50, (E) Silica-D25N75 and (F) Silica-N100 nanoparticles.

**Figure S3.** The content ratios of the PNIPAAm (mol)/PDEAEMA (mol), (●) in feed, (□) calculated by  $^1\text{H}$  NMR for the unreacted polymers.

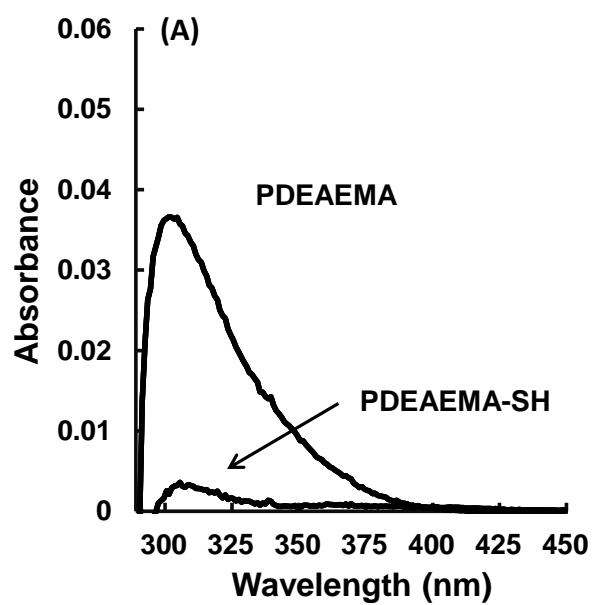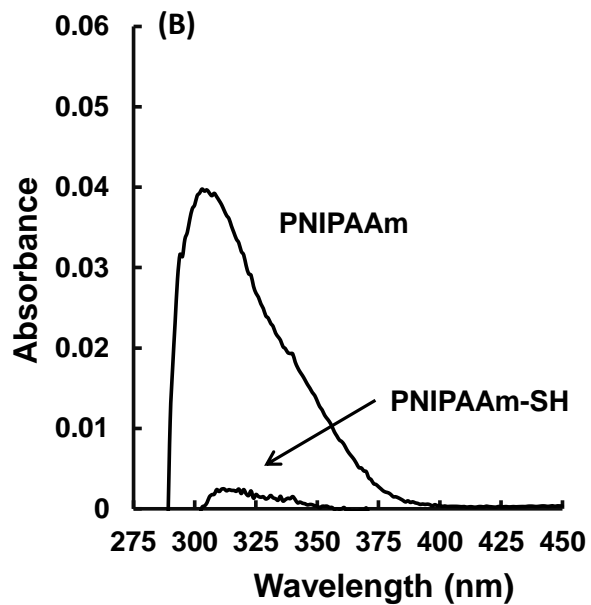

**Figure S1.** UV spectra of aqueous solution of (A) PDEAEMA-SH and (B) PNIPAAm-SH.

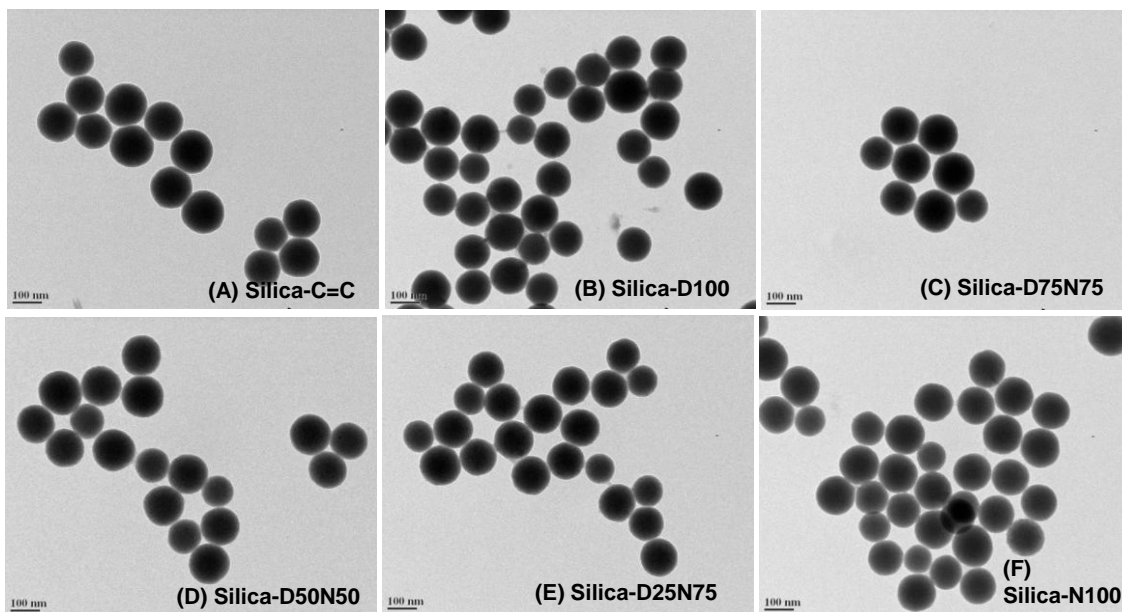

**Figure S2.** TEM image of (A) Silica-C=C, (B) Silica-D100, (C) Silica-D75N25, (D) Silica-D50N50, (E) Silica-D25N75 and (F) Silica-N100 nanoparticles.

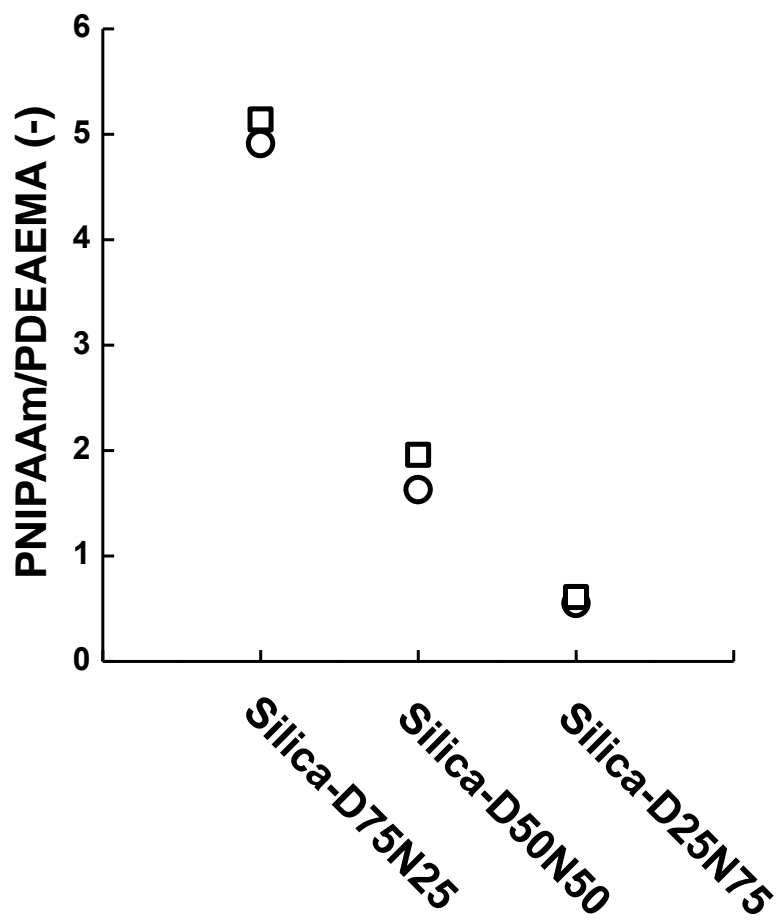

**Figure S3.** The content ratios of the PNIPAAm (mol)/PDEAEMA (mol), (●) in feed, (□) calculated by <sup>1</sup>H NMR for the unreacted polymers.
